# Supplementary material for: Lipase-catalyzed acylation of levoglucosan in continuous flow: antibacterial and biosurfactant studies
Source: PubMed Central journal article supplement — RSC Adv. 2022 Jan 21;12(5):3027–35. doi: 10.1039/d1ra08111j (PMC8979102; doi:10.1039/d1ra08111j), 2022-01-21
Supplement: RA-012-D1RA08111J-s001.pdf [file RA-012-D1RA08111J-s001.pdf]

1  
2  
3  
4  
5  
6  
7  
8  
9  
10  
11  
12  
13  
14  
15  
16  
17  
18  
19  
20  
21  
22  
23  
24  
25  
26  
27  
28  
29  
30  
31  
32  
33

*Supporting Information*

***Lipase-catalyzed acylation of levoglucosan in continuous flow:  
antibacterial and biosurfactant studies***

Marcelo A. Nascimento,<sup>1,5</sup> Juan P. C. Vargas,<sup>2</sup> José G. A. Rodrigues,<sup>3</sup> Raquel A. C. Leão,<sup>1</sup> Patricia H. B. de Moura,<sup>4</sup> Ivana C. R. Leal,<sup>4</sup> Jonathan B. F. de Souza,<sup>5</sup> Rodrigo O. M. A. de Souza,<sup>1</sup> Robert Wojcieszak<sup>5</sup> and Ivaldo Itabaiana Jr <sup>5,6\*</sup>

1- Biocatalysis and Organic Synthesis Group, Chemistry Institute, Federal University of Rio de Janeiro, CEP: 21941-909, Brazil;

2- Nanotechnology Engineering Program, COPPE, Universidade Federal do Rio de Janeiro, UFRJ, Rio de Janeiro, Brazil

3- Institute of Chemistry, Federal University of Rio de Janeiro, University City, 21941-909, Rio de Janeiro, Brazil

4-Laboratory of Natural Products and Biological Assays, Department of Natural Products and Food, Pharmacy Faculty, Federal University of Rio de Janeiro, 21941-902, Rio de Janeiro, Brazil;

5- Univ. Lille, CNRS, Centrale Lille, Univ. Artois, UMR 8181 - UCCS - Unité de Catalyse et Chimie du Solide, F-59000, Lille, France;

6-Laboratory of Technological Biochemistry and Biocatalysis, Department of Biochemical Engineering, School of Chemistry, Federal University of Rio de Janeiro, 21941-909, Rio de Janeiro, Brazil.

\*Corresponding author: [ivaldo@eq.ufrj.br](mailto:ivaldo@eq.ufrj.br)

**Keywords:** Levoglucosan, Lipase, Esters, Design of Experiment, Continuous Flow.

|    |                                                                             |    |
|----|-----------------------------------------------------------------------------|----|
| 34 | <b>Summary</b>                                                              |    |
| 35 | 1. Reaction optimization in continuous flow .....                           | 3  |
| 36 | 1.1. Experimental setup .....                                               | 3  |
| 37 | 1.2. CCD planning matrix.....                                               | 4  |
| 38 | 1.3. Hydrolytic Activity Assay .....                                        | 4  |
| 39 | 1.4. Solubility tests of levoglucosan and acyl donors in acetonitrile ..... | 5  |
| 40 | 2. Analytical Methods .....                                                 | 6  |
| 41 | 2.1. Gas Chromatography Analysis .....                                      | 6  |
| 42 | 2.2. Determination of surface activity .....                                | 9  |
| 43 | 2.3. Antibacterial Assays .....                                             | 10 |
| 44 | 2.4. Nuclear Magnetic Resonance.....                                        | 11 |
| 45 | Reference .....                                                             | 14 |
| 46 |                                                                             |    |
| 47 |                                                                             |    |
| 48 |                                                                             |    |
| 49 |                                                                             |    |
| 50 |                                                                             |    |
| 51 |                                                                             |    |
| 52 |                                                                             |    |
| 53 |                                                                             |    |
| 54 |                                                                             |    |
| 55 |                                                                             |    |
| 56 |                                                                             |    |
| 57 |                                                                             |    |
| 58 |                                                                             |    |
| 59 |                                                                             |    |

60 **1. Reaction optimization in continuous flow**61 **1.1. Experimental setup**

62

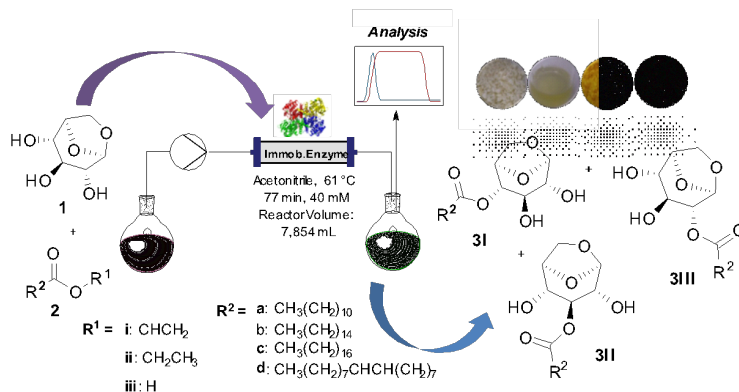

63

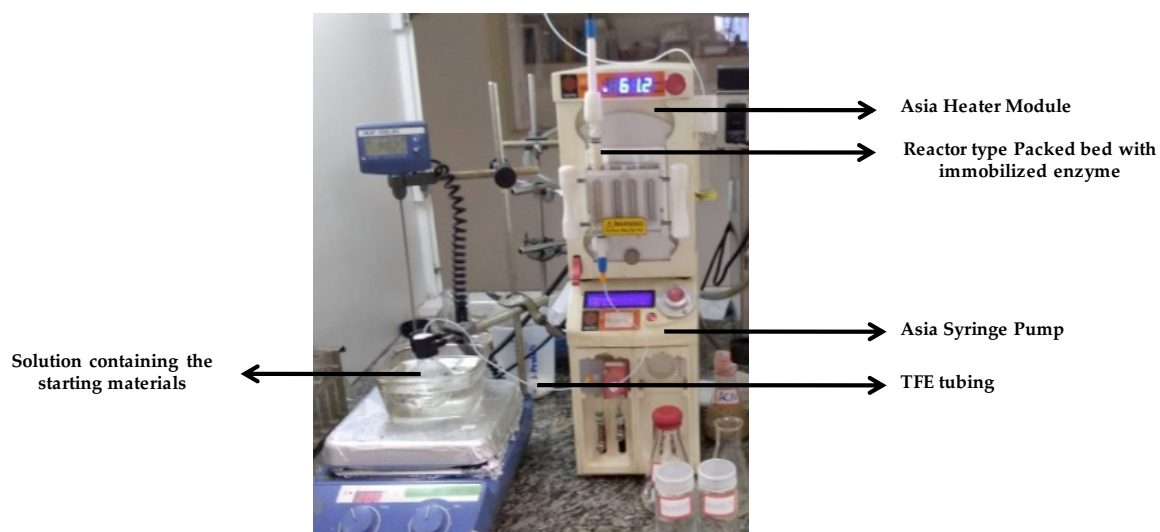

64

65 **Figure S1:** Esterification reaction of levoglucosan with different vinyl esters.\*Reactor volume: 7.854mL. a:66 vinyl laurate, **b:** vinyl palmitate, **c:** vinyl stearate and **d:** vinyl oleate. Immobilized Enzyme: **N435** = Novozym67 435 (*Candida antarctica* lipase B), immobilized in resin Lewatit VP OC 1600; **CaLB\_Epoxy** = *Candida*68 *antarctica* lipase B immobilized on epoxy support by our research group.

69

70

71

72

## 73 1.2. CCD planning matrix

74 **Table S1:** CCD planning matrix for two variables real and normalized levels and the response obtained.

| EXP | X <sub>1</sub> | X <sub>2</sub> | Conversion % |
|-----|----------------|----------------|--------------|
| 1   | (-1)           | (-1)           | 31           |
| 2   | (1)            | (-1)           | 38           |
| 3   | (-1)           | (1)            | 50           |
| 4   | (1)            | (1)            | 54           |
| 5   | (-1,42)        | (0)            | 26           |
| 6   | (1,42)         | (0)            | 36           |
| 7   | (0)            | (-1,42)        | 28           |
| 8   | (0)            | (1,42)         | 54           |
| 9   | (0)            | (0)            | 54           |
| 10  | (0)            | (0)            | 54           |
| 11  | (0)            | (0)            | 56           |

## 75 1.3. Hydrolytic Activity Assay

76

77

78

79

80

81

82

83

84

85

The activities of free and immobilized lipases were determined as follows: 1 mL of extract or 10 mg of each supported enzyme were added to 19 mL of an emulsion prepared with olive oil (5 % v/v) and arabic gum (10 % v/v) in sodium phosphate buffer (100 mM, pH 7.0). The reactions were carried out under stirring (200 rpm) at 35 °C for 30 min. The reactions were then stopped by the addition of 20 mL of acetone-ethanol mixture (1:1 v/v) and the fatty acids produced were extracted under agitation (200 rpm) for 10 min and titrated until end-point (pH 11.0) with NaOH solution (0.04 N). The blank assays were performed by adding the extract just after the addition of the acetone-ethanol solution to the flask. One unit of lipase activity (U) was defined as the amount of enzyme which catalyzes the release of 1 μmol of fatty acids per minute, under the assay conditions.<sup>1,2</sup>

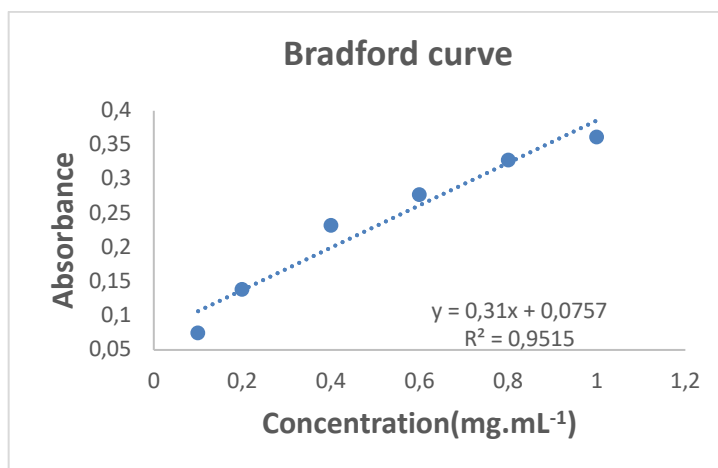

86

87

**Figure S2:** Bradford curve for protein quantification.

88

**Table S2:** Immobilization efficiency of e new biocatalysts compared to that of N435

| Biocatalilyst Immobilized | Amount of protein (mg/g of support) | IPC (%) <sup>a</sup> | H <sub>A</sub> (U.g <sup>-1</sup> of support) <sup>b</sup> | S <sub>A</sub> (U.mg <sup>-1</sup> of protein) <sup>c</sup> |
|---------------------------|-------------------------------------|----------------------|------------------------------------------------------------|-------------------------------------------------------------|
| N435 <sup>2</sup>         | 15.0                                | -                    | 248.0                                                      | 16.53                                                       |
| CalB_Epoxy                | 9.0                                 | >99                  | 372.0                                                      | 41.33                                                       |

89

<sup>a</sup>IPC: immobilized protein concentration; <sup>b</sup> Hydrolytic activity; <sup>c</sup> Specific activity

90

$$91 \quad {}^a \text{IPC (\%)}: \left( \frac{P_0 - P_f}{P_0} \right) * 100$$

92 **P<sub>0</sub> and P<sub>f</sub> are the initial and final time protein concentrations in the supernatant (mg.mL<sup>-1</sup>), respectively.**

93

$$94 \quad {}^b \text{Hydrolytic activity (H}_A\text{)}: \frac{(V - V_b)}{t * V_a} * M * 1000$$

95 Where, V and V<sub>b</sub> are the volume (mL) of NaOH solution used for sample and blank titration, respectively; t is  
96 the reaction time (min); M is the molarity (mmol.mL<sup>-1</sup>) and V<sub>a</sub> is the sample volume (mL).

$$97 \quad {}^c \text{Specific activity (S}_A\text{)}: \frac{U}{\text{milligrams of protein}}$$

98

#### 99 **1.4. Solubility tests of levoglucosan and acyl donors in acetonitrile**

100

101 Levoglucosan and acyl donors vinyl laurate, ethyl laurate, lauric acid, vinyl stearate, vinyl oleate and

102 vinyl palmitate were subjected to solubility tests. 40 and 100 mM solutions were prepared in a total volume

103 of 500 mL of acetonitrile. The temperatures tested were 45, 50 and 55 °C and shaken at 200 rpm in an

104 orbital shaker incubator for 30 min. The numbers below have been assigned in relation to the solubility of

105 the reagents:

106 1 – Insoluble: turbid solution and background body;

107 2 – Partially soluble: turbid solution;

108 3 – Completely soluble: Clear solution

109 **Table S3:** Solubility tests of levoglucosan and acyl donors in acetonitrile

| Reagent         | Temperature (°C) |        |       |        |       |        |
|-----------------|------------------|--------|-------|--------|-------|--------|
|                 | 45               |        | 50    |        | 55    |        |
|                 | 40 mM            | 100 mM | 40 mM | 100 mM | 40 mM | 100 mM |
| Levoglucosan    | 1                | 1      | 1     | 1      | 3     | 3      |
| Lauric acid     | 3                | 3      | 3     | 3      | 3     | 3      |
| Ethyl laurate   | 2                | 2      | 2     | 2      | 2     | 2      |
| Vinyl laurate   | 2                | 2      | 3     | 3      | 3     | 3      |
| Vinyl stearate  | 2                | 2      | 3     | 3      | 3     | 3      |
| Vinyl palmitate | 3                | 3      | 3     | 3      | 3     | 3      |
| Vinyl oleate    | 3                | 3      | 3     | 3      | 3     | 3      |

110

## 111 2. Analytical Methods

### 112 2.1. Gas Chromatography Analysis

113

114 The reactions were monitored by thin layer chromatography (TLC) and, subsequently, 10  $\mu$ L of each

115 sample were collected and derivatized with 10  $\mu$ L of BSTFA in an orbital shaker incubator at 200 rpm, 60 °C

116 and 90 min. After that, they were swelled with ethyl acetate to 0.5 mL and analyzed in a gas chromatograph

117 equipped with a mass spectrometry detector (CG-MS).<sup>3,4</sup> Helium was applied as carrier gas in all analyses.

118 Analyses were performed in a GC-MS (Shimadzu CG2010 –SLB-5MS capillary column 30 m, 0.25 mm ID, 0.25  
 119 um film thickness). Samples were prepared by diluting 20 µL of the final product in 980 µL of ethyl acetate.  
 120 The injector and detector temperatures were 250 °C, and the oven was maintained at 80 °C for 4 min,  
 121 increased to 200 °C at a rate of 6 °C/min for 10 min, increased to 310 °C at a rate of 8 °C/min, when it was  
 122 held constant for 4 min, totaling 51.75 min.

123 In this section, we will show the illustrative chromatograms obtained in the steps of higher product  
 124 conversions, in the esterification reactions with vinyl laurate using CalB\_Epoxy and N435 for the synthesis of  
 125 CFAEs.  
 126

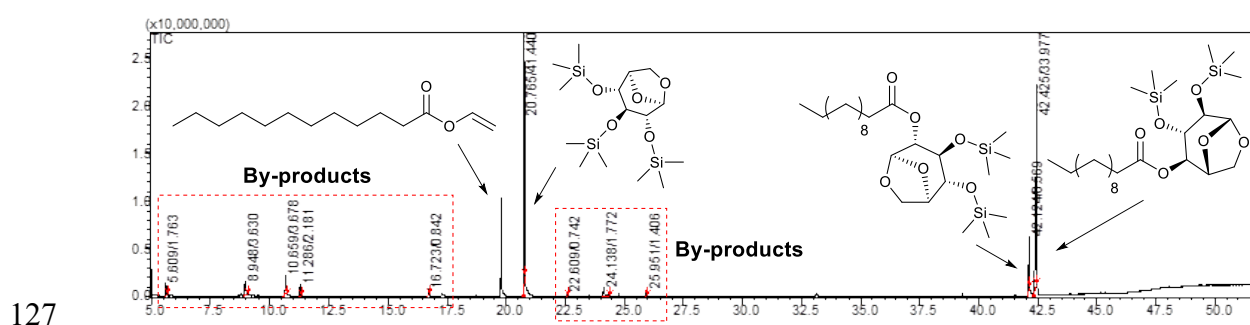

128 **Figure S3:** Chromatogram of levoglucosan reaction with vinyl laurate using CalB\_Epoxy  
 129 (derivatized) 61 °C.

130

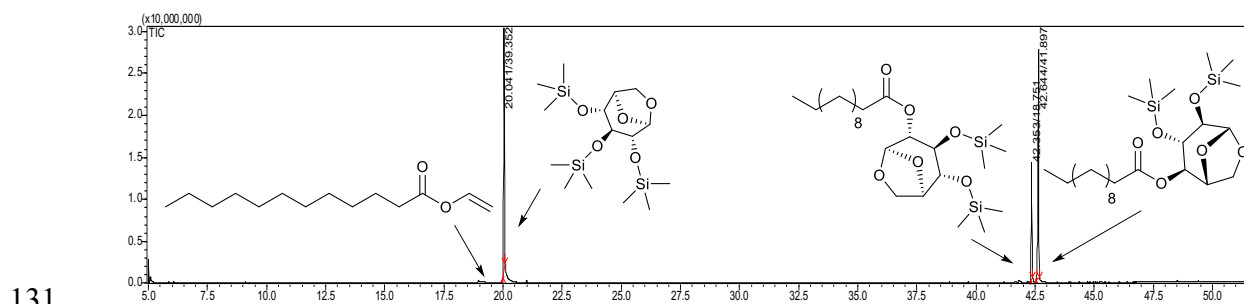

132 **Figure S4:** Chromatogram of levoglucosan reaction with vinyl laurate using N435 (derivatized) 61  
 133 °C

134

135 In this section, we will show the illustrative chromatograms obtained of monoesters levoglucosan that were  
 136 separated from unreacted reagents by flash chromatography

137

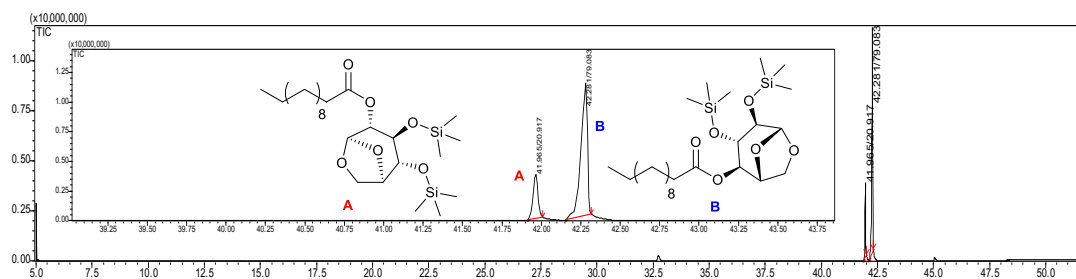

138

139

140

**Figure S5:** Chromatogram of MONLAU. Mixture of 4- and 2-: O-Lauryl-1,6-anhydroglucopyranose.

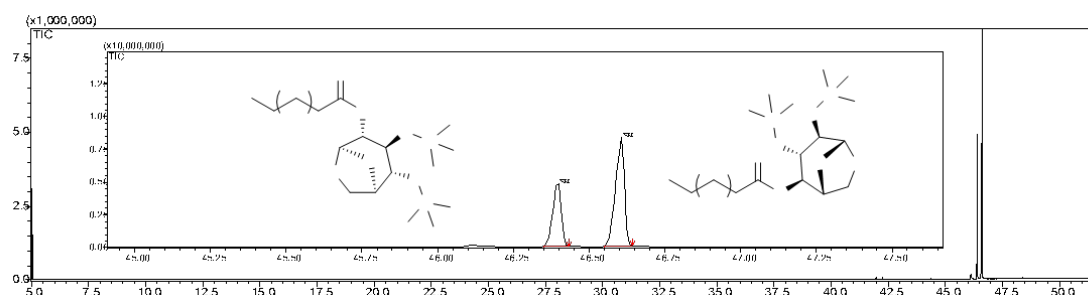

141

142

143

144

**Figure S6:** Chromatogram of MONPAL. Mixture of 4- and 2-: O-Palmitoyl-1,6-anhydroglucopyranose.

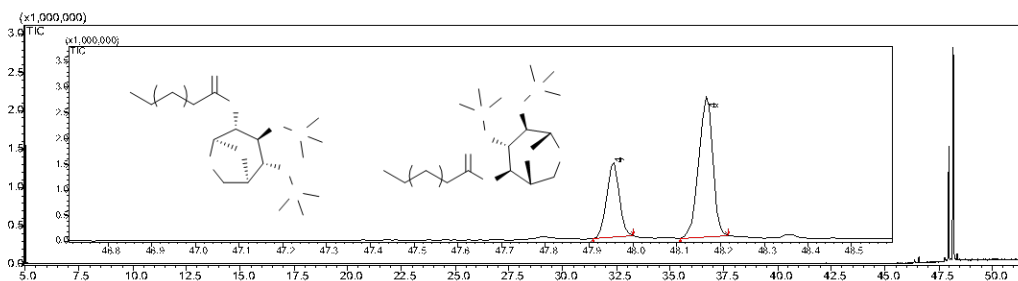

145

146

**Figure S7:** Chromatogram of MONEST. Mixture of 4- and 2-: O-Esteryl-1,6-anhydroglucopyranose.

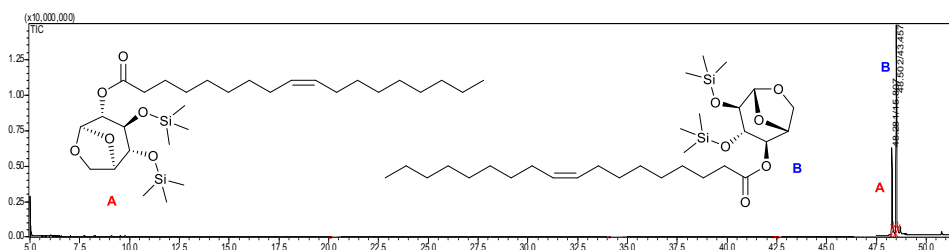

147

148

149

150

**Figure S8:** Chromatogram of MONOLE. Mixture of 4- and 2-: O-Oleoyl-1,6-anhydroglucopyranose.



151 **2.2. Determination of surface activity**

152

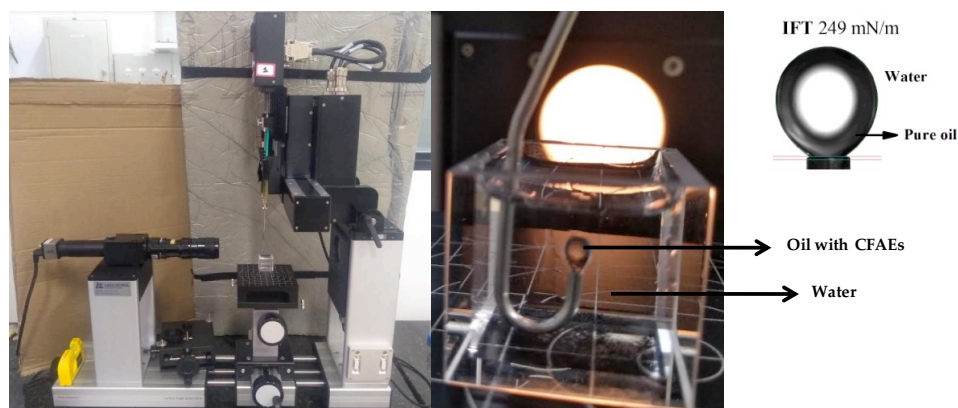

153

154 **Figure S9:** Evaluation of pendant drop (PD) method using Goniometer OCA25 (DataPhysic Instruments,  
155 Germany)

156

157 **Table S4:** Variation of the interface tension with the concentration of CFAEs: MONLAU, MONPAL, MONEST  
158 and MONOLE in oil at 25 °C

| Compound | CONCENTRATION (mM) |          |          |          |          |          |          |          |          |          |          |          |
|----------|--------------------|----------|----------|----------|----------|----------|----------|----------|----------|----------|----------|----------|
|          | 0                  | 5        | 10       | 20       | 30       | 40       | 50       | 60       | 75       | 100      | 120      | 150      |
|          | IFT[mN/m]          |          |          |          |          |          |          |          |          |          |          |          |
| MONLAU   | 249,39             | 176,6    | 166,9333 | 137,1033 | 115,3817 | 111,8117 | 96,39    | 88,71833 | 90,55667 | 90,55667 | 90,49333 | 89,97667 |
| MONPAL   | 249,39             | 184,85   | 155,966  | 133,252  | 121,818  | 105,58   | 88,214   | 88,53    | 86,576   | 89,48    | 88,356   | 86,346   |
| MONEST   | 249,39             | 226,435  | 222,73   | 212,1933 | 200,3917 | 178,6117 | 177,4317 | 171,5917 | 141,16   | 135,56   | 140,1933 | 139,655  |
| MONOLE   | 249,39             | 237,5083 | 198,1483 | 188,79   | 158,9    | 148,5333 | 134,6317 | 102,4817 | 105,3367 | 104,0533 | 103,1367 | 105,6033 |

159

160

161 **Table S5:** Variation of the interface tension with the concentration of MONLAU in oil at 25 °C

| Compound | CONCENTRATION (mM) |          |          |          |          |          |          |          |          |          |          |
|----------|--------------------|----------|----------|----------|----------|----------|----------|----------|----------|----------|----------|
|          | 5                  | 10       | 20       | 30       | 40       | 50       | 60       | 75       | 100      | 120      | 150      |
|          | IFT[mN/m]          |          |          |          |          |          |          |          |          |          |          |
| MONLAU   | 175,6              | 168,13   | 136,85   | 114,99   | 111,95   | 96,87    | 89,31    | 90,58    | 91,3     | 90,78    | 91,14    |
|          | 176,47             | 167,52   | 136,77   | 115,16   | 111,98   | 96,78    | 89,14    | 90,8     | 91,17    | 90,52    | 89,14    |
|          | 177,91             | 166,94   | 136,75   | 115,21   | 111,8    | 95,49    | 88,73    | 91,14    | 91,17    | 89,91    | 88,73    |
|          | 177,24             | 166,34   | 136,7    | 115,9    | 111,4    | 96,77    | 88,53    | 90,02    | 90,58    | 90,42    | 90,52    |
|          | 176,31             | 166,12   | 137,69   | 115,36   | 111,83   | 95,9     | 88,43    | 90,78    | 89       | 90,91    | 89,91    |
|          | 176,07             | 166,55   | 137,86   | 115,67   | 111,91   | 96,53    | 88,17    | 90,02    | 90,12    | 90,42    | 90,42    |
| Average  | 176,6              | 166,9333 | 137,1033 | 115,3817 | 111,8117 | 96,39    | 88,71833 | 90,55667 | 90,55667 | 90,49333 | 89,97667 |
| Sd       | 0,837568           | 0,766385 | 0,525268 | 0,341843 | 0,213112 | 0,565084 | 0,435266 | 0,452975 | 0,885362 | 0,348578 | 0,905951 |

162

163

Sd: Standard deviation

164

165 **Table S6:** Variation of the interface tension with the concentration of MONPAL in oil at 25 °C

| Compound | CONCENTRATION (mM) |          |          |          |          |          |          |          |          |          |          |
|----------|--------------------|----------|----------|----------|----------|----------|----------|----------|----------|----------|----------|
|          | 5                  | 10       | 20       | 30       | 40       | 50       | 60       | 75       | 100      | 120      | 150      |
|          | IFT[mN/m]          |          |          |          |          |          |          |          |          |          |          |
| MONPAL   | 185,71             | 154,56   | 134,59   | 123,12   | 106,58   | 89,39    | 88,34    | 87,11    | 89,76    | 88,9     | 86,17    |
|          | 184,15             | 155,57   | 134,41   | 121,98   | 106,01   | 88,95    | 87,91    | 86,17    | 89,63    | 88,52    | 86,06    |
|          | 184,4              | 155,95   | 132,51   | 121,66   | 105,55   | 88,88    | 87,87    | 86,06    | 89,48    | 88,11    | 86,06    |
|          | 184,28             | 156,79   | 131,9    | 121,7    | 105,28   | 87,05    | 89,36    | 86,05    | 89,36    | 88,34    | 86,05    |
|          | 185,71             | 156,96   | 132,85   | 120,63   | 104,48   | 86,8     | 89,17    | 87,49    | 89,17    | 87,91    | 87,39    |
| Average  | 184,85             | 155,966  | 133,252  | 121,818  | 105,58   | 88,214   | 88,53    | 86,576   | 89,48    | 88,356   | 86,346   |
| Sd       | 0,790032           | 0,974797 | 1,190722 | 0,890461 | 0,788321 | 1,196089 | 0,699035 | 0,676077 | 0,229891 | 0,381615 | 0,585688 |

166

167

Sd: Standard deviation

168 **Table S7:** Variation of the interface tension with the concentration of MONEST in oil at 25 °C

| Compound | CONCENTRATION (mM) |          |          |          |          |          |          |          |          |          |          |
|----------|--------------------|----------|----------|----------|----------|----------|----------|----------|----------|----------|----------|
|          | 5                  | 10       | 20       | 30       | 40       | 50       | 60       | 75       | 100      | 120      | 150      |
|          | IFT[mN/m]          |          |          |          |          |          |          |          |          |          |          |
| MONEST   | 225,68             | 221,57   | 211,57   | 200,04   | 177,94   | 178,01   | 171,7    | 142,56   | 136,51   | 137,8    | 141,25   |
|          | 227,78             | 221,45   | 210,91   | 200,71   | 177,92   | 177,36   | 171,37   | 142,25   | 136,27   | 139,01   | 141,36   |
|          | 226,61             | 223,17   | 213,17   | 199,72   | 181,39   | 176,78   | 170,87   | 138,66   | 133,18   | 142,56   | 140,88   |
|          | 225,87             | 222,59   | 212,59   | 200,66   | 176,82   | 177,31   | 171,9    | 141,25   | 136,14   | 142,25   | 137,09   |
|          | 227,44             | 225,4    | 211,75   | 200,58   | 179,85   | 178,43   | 171,47   | 141,36   | 135,42   | 138,66   | 135,47   |
|          | 225,23             | 222,2    | 213,17   | 200,64   | 177,75   | 176,7    | 172,24   | 140,88   | 135,84   | 140,88   | 141,88   |
| Average  | 226,435            | 222,73   | 212,1933 | 200,3917 | 178,6117 | 177,4317 | 171,5917 | 141,16   | 135,56   | 140,1933 | 139,655  |
| Sd       | 1,018916           | 1,456503 | 0,927053 | 0,411165 | 1,68135  | 0,679865 | 0,471568 | 1,380188 | 1,225186 | 1,989067 | 2,683123 |

169 Sd: Standard deviation  
170171 **Table S8:** Variation of the interface tension with the concentration of MONOLE in oil at 25 °C  
172

| Compound | CONCENTRATION (mM) |          |          |          |          |          |          |          |          |          |          |
|----------|--------------------|----------|----------|----------|----------|----------|----------|----------|----------|----------|----------|
|          | 5                  | 10       | 20       | 30       | 40       | 50       | 60       | 75       | 100      | 120      | 150      |
|          | IFT[mN/m]          |          |          |          |          |          |          |          |          |          |          |
| MONOLE   | 238,53             | 198      | 187,84   | 158,84   | 152,43   | 134,95   | 102,67   | 107,41   | 102,94   | 103,4    | 105,85   |
|          | 237,96             | 198,18   | 188,69   | 157,61   | 147,96   | 134,53   | 103,88   | 107,12   | 103,66   | 102,67   | 107,41   |
|          | 237,79             | 197,36   | 187,67   | 161,79   | 148,21   | 135,48   | 102,21   | 104,61   | 104,33   | 103,88   | 107,12   |
|          | 236,89             | 199,73   | 190,55   | 160,04   | 147,95   | 134,67   | 101,69   | 104,97   | 104,02   | 102,21   | 104,61   |
|          | 236,67             | 197,66   | 191,98   | 158,04   | 147,34   | 134,29   | 101,77   | 102,94   | 103,4    | 101,69   | 104,97   |
|          | 237,21             | 197,96   | 186,01   | 157,08   | 147,31   | 133,87   | 102,67   | 104,97   | 105,97   | 104,97   | 103,66   |
| Average  | 237,5083           | 198,1483 | 188,79   | 158,9    | 148,5333 | 134,6317 | 102,4817 | 105,3367 | 104,0533 | 103,1367 | 105,6033 |
| Sd       | 0,707288           | 0,827053 | 2,152626 | 1,753362 | 1,943097 | 0,553115 | 0,80415  | 1,674511 | 1,055683 | 1,196021 | 1,468982 |

173 Sd: Standard deviation  
174  
175176 **2.3. Antibacterial Assays**177 **Table S9:** Strains used in the antibacterial assays

| Bacterial species                                                 | Code       | Isolation source | Susceptibility profile   |
|-------------------------------------------------------------------|------------|------------------|--------------------------|
| <i>Staphylococcus aureus</i><br>subsp. <i>aureus</i><br>Rosenbach | ATCC 29213 | Injury           | Sensitive to methicillin |
|                                                                   | ATCC 33591 | Clinical isolate | Resistant to methicillin |
|                                                                   | ATCC 25933 | Clinical isolate | Sensitive to methicillin |
| <i>Staphylococcus aureus</i>                                      | 517        | Blood            | Resistant to methicillin |

178

179

180

181

182

183

184 **2.4. Nuclear Magnetic Resonance**

185

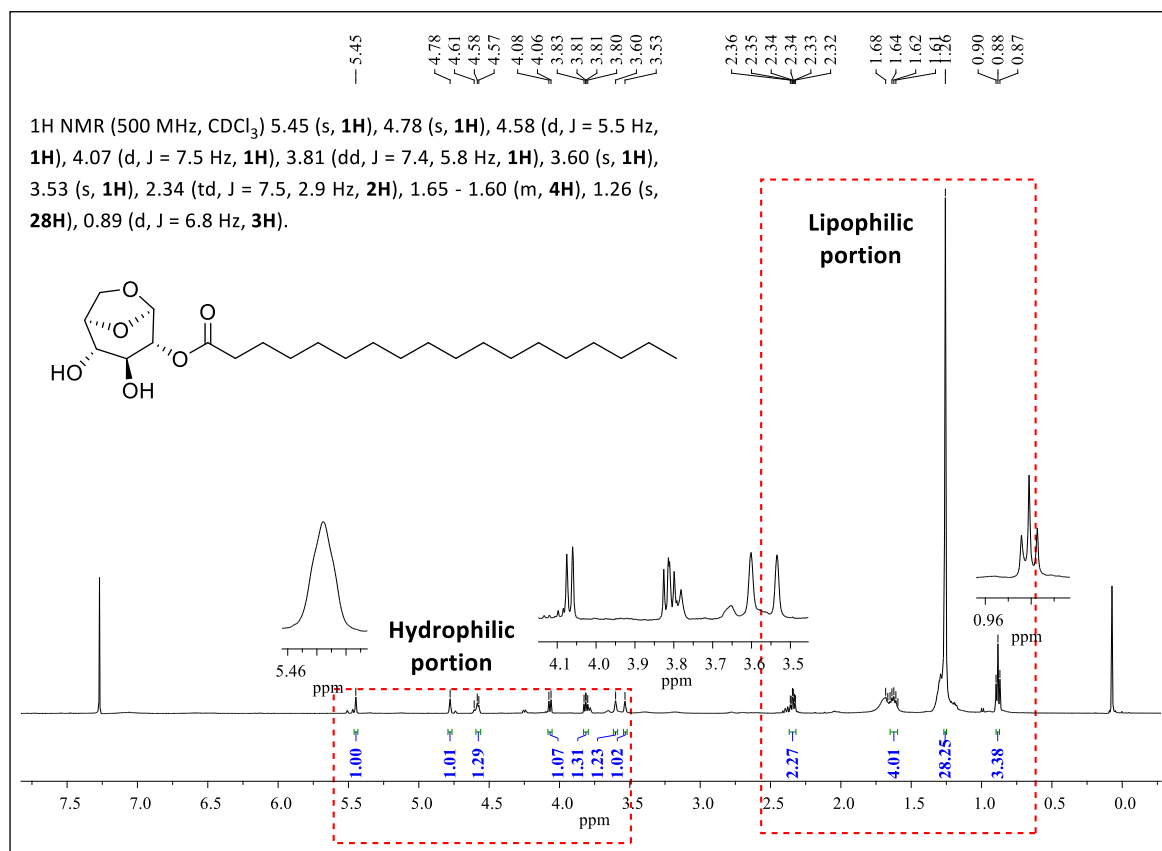

186

187 **Figure S10:** 1H-NMR Spectrum for 2-O-Estearyl-1,6-anhydroglucopyranose (CDCl<sub>3</sub>).

188

189

190

191

192

193

194

195

196

197

198

199

200

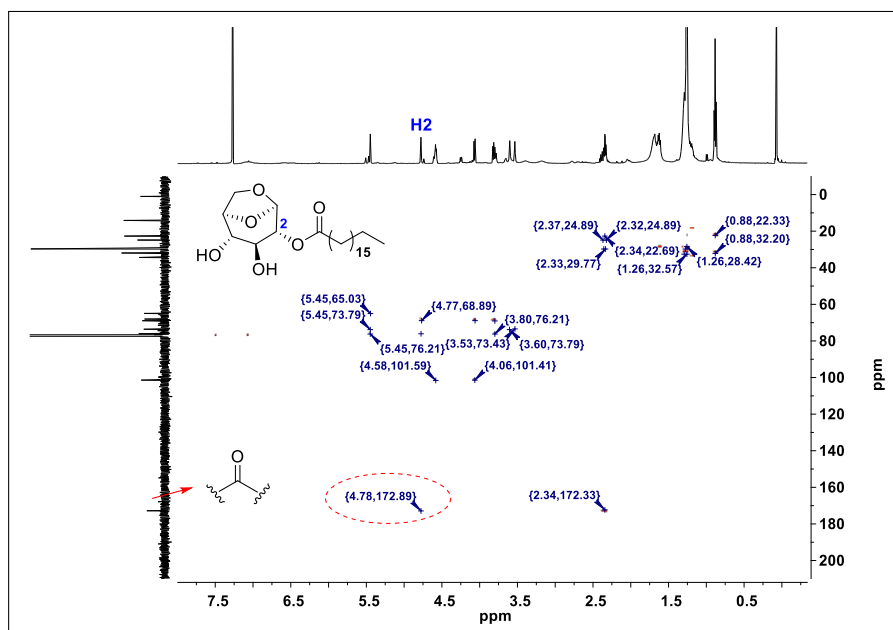

201  
202  
203  
204  
205

Figure S11: HMBC for 2-O-Estearyl-1,6-anhydroglucopyranose ( $\text{CDCl}_3$ ).

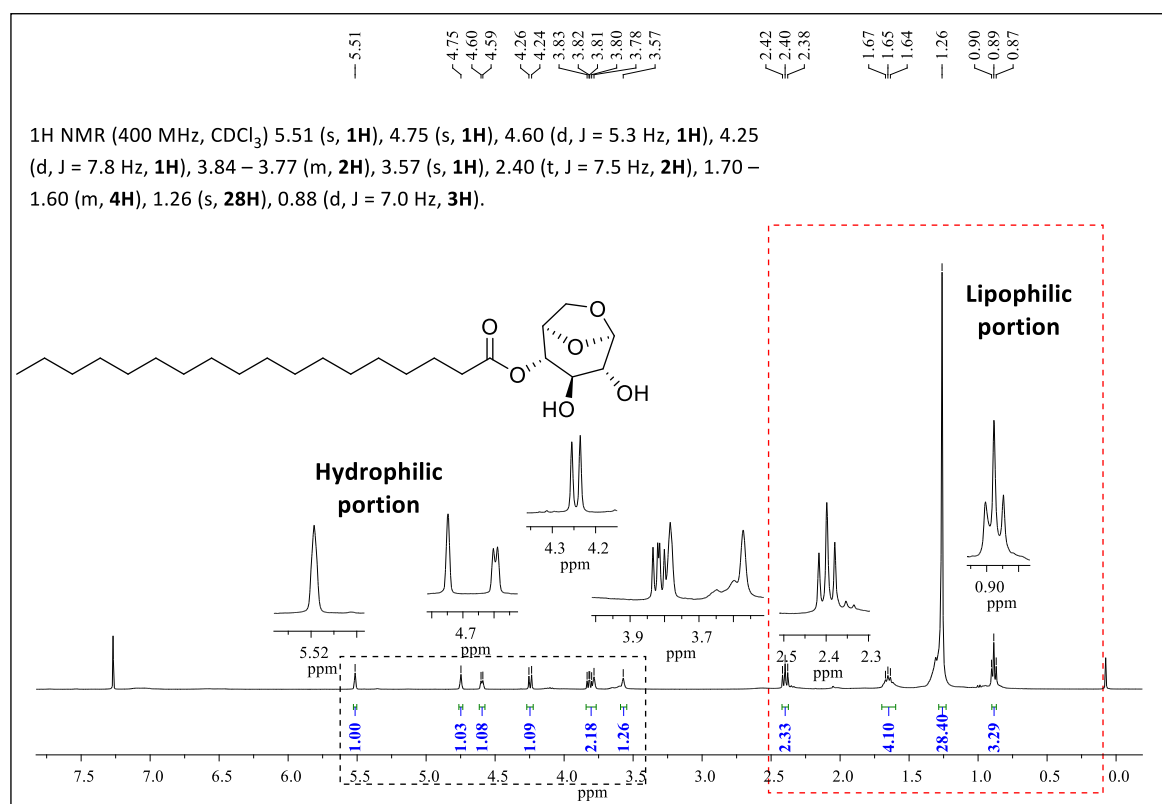

206  
207  
208

Figure S12: 1H-NMR Spectrum for 4-O-Estearyl-1,6-anhydroglucopyranose ( $\text{CDCl}_3$ ).

209

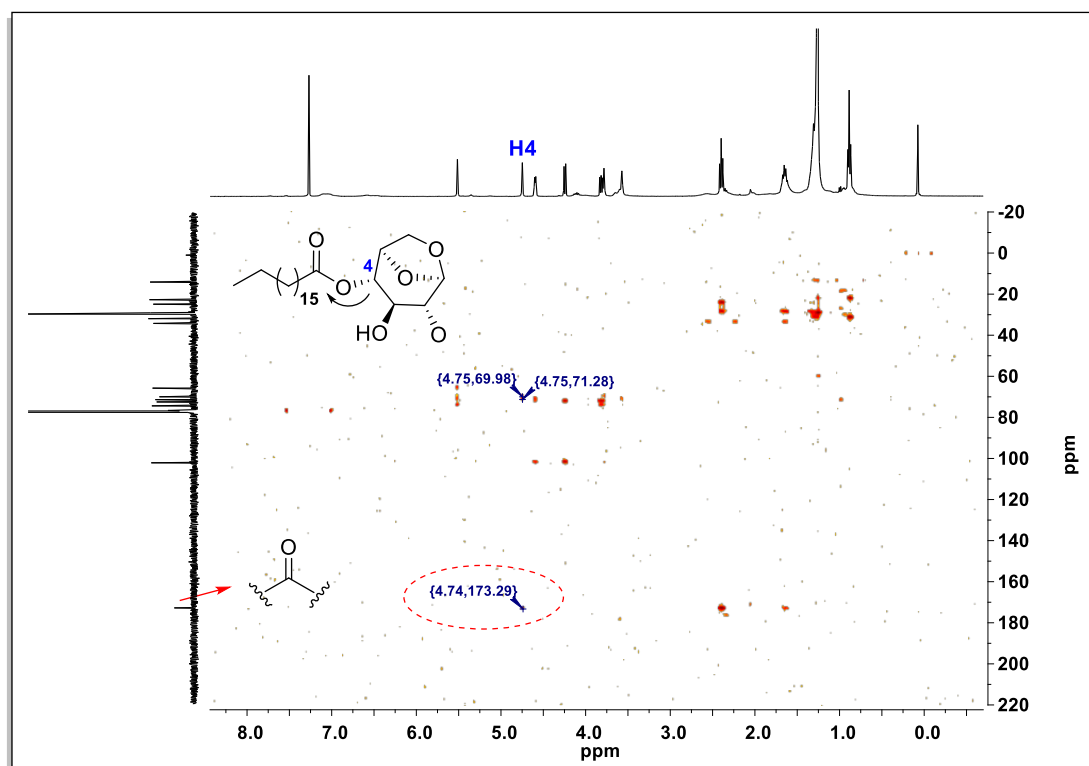

210

211

Figure S13: HMBC for 4-O-Estearyl-1,6-anhydroglucopyranose (CDCl<sub>3</sub>).

212

213

214

215

216

217

218

219

220

221 **Reference**

- 222 1 D. M. Freire, E. M. Teles, E. P. Bon and G. L. Sant' Anna, *Appl. Biochem.*  
223 *Biotechnol.*, 1997, **63–65**, 409–421.
- 224 2 M. A. Do Nascimento, L. E. Gotardo, R. A. C. Leão, A. M. De Castro, R. O. M. A.  
225 De Souza and I. Itabaiana, *ACS Omega*, 2019, **4**, 860–869.
- 226 3 Z. Zdráhal, J. Oliveira, R. Vermeulen, M. Claeys and W. Maenhaut, *Environ. Sci.*  
227 *Technol.*, 2002, **36**, 747–753.
- 228 4 C. Schummer, O. Delhomme, B. M. R. Appenzeller, R. Wennig and M. Millet,  
229 *Talanta*, 2009, **77**, 1473–1482.
- 230
- 231
